# Supplementary material
Source: PubMed Central journal article supplement (PMC8014151)
Supplement: RESP-26-442-s001.pdf [file RESP-26-442-s001.pdf]

# ACE2 Expression is elevated in airway epithelial cells from aged and male donors *but* reduced in asthma

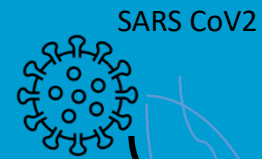

## COVID-19 and acute pneumonitis

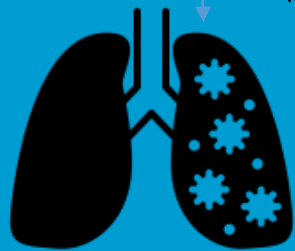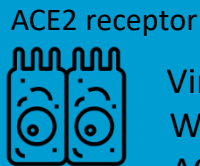

Virus binds to ACE2  
What factors affect ACE2 expression in lower airways in chronic lung disease?

Increased ACE2 in lower airways cells may increase risk of pneumonia?

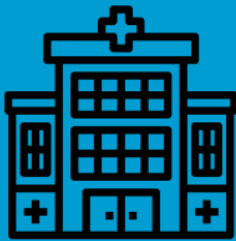

## Lower airway samples

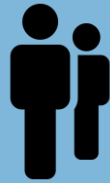

2 Australian Cohorts:

- Newcastle, NSW n=115 (enriched asthma and COPD)
- Perth, WA, n=30 (children & adults)

ACE2 mRNA and protein

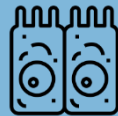

Cultured bronchial airway cells

Endobronchial biopsies

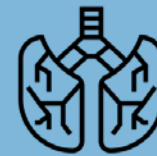

## Outcomes In all people

Increased ACE2 receptor independently associated

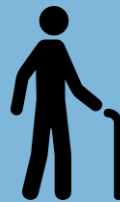

with **age** and **male sex**

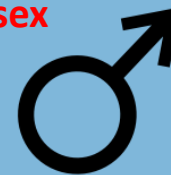

## Outcomes in Asthma

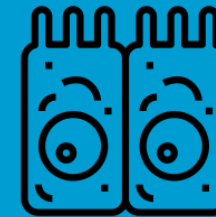

- Reduced ACE2 expression
  - mRNA and protein
  - Compared to healthy & COPD
- No difference in TMPRSS2
- Reduced Furin expression
  - assists virus endocytosis
- Increased ADAM-17
  - ability to cleave ACE2 from cell surface

## Conclusions

- Host gene expression regulating SARS CoV2 viral entry in human airway epithelial cells is correlated with the key susceptibility factors for COVID-19: Age and male sex.
- Lower ACE2 expression in asthma may be:
  - a feature of chronic type 2 airway inflammation?
  - a consequence of inhaled corticosteroids?
